# Supplementary material for: Barriers and facilitators associated with the upscaling of the Transmural Trauma Care Model: a qualitative study
Source: Springer Nature journal article supplement (doi:10.1186/s12913-024-10643-7), 2024-02-13
Supplement: MOESM1 [file 26729862]

## Consolidated criteria for reporting qualitative studies (COREQ): 32-item checklist

For further information about the COREQ guidelines, please see Tong *et al.*, 2017:

<https://doi.org/10.1093/intqhc/mzm042>

| No.                                            | Item                                     | Description                                                                                                                                                     | Section #                                                                    |
|------------------------------------------------|------------------------------------------|-----------------------------------------------------------------------------------------------------------------------------------------------------------------|------------------------------------------------------------------------------|
| <b>Domain 1: Research team and reflexivity</b> |                                          |                                                                                                                                                                 |                                                                              |
| Personal characteristics                       |                                          |                                                                                                                                                                 |                                                                              |
| 1.                                             | Interviewer/facilitator                  | Which author/s conducted the interview or focus group?                                                                                                          | Methods, Data preparation, page 4                                            |
| 2.                                             | Credentials                              | What were the researcher's credentials? <i>E.g. PhD, MD</i>                                                                                                     | Methods, Data preparation, page 4                                            |
| 3.                                             | Occupation                               | What was their occupation at the time of the study?                                                                                                             | Methods, Data preparation, page 4                                            |
| 4.                                             | Gender                                   | Was the researcher male or female?                                                                                                                              | not stated                                                                   |
| 5.                                             | Experience and training                  | What experience or training did the researcher have?                                                                                                            | Methods, Data preparation, page 4                                            |
| Relationship with participants                 |                                          |                                                                                                                                                                 |                                                                              |
| 6.                                             | Relationship established                 | Was a relationship established prior to study commencement?                                                                                                     | Methods, Data preparation, page 4                                            |
| 7.                                             | Participant knowledge of the interviewer | What did the participants know about the researcher? <i>E.g. Personal goals, reasons for doing the research</i>                                                 | Relevant information was disseminated in the introduction of the interviewer |
| 8.                                             | Interviewer characteristics              | What characteristics were reported about the interviewer/facilitator? <i>E.g. Bias, assumptions, reasons and interests in the research topic</i>                | Relevant information was disseminated in the introduction of the interviewer |
| <b>Domain 2: Study design</b>                  |                                          |                                                                                                                                                                 |                                                                              |
| Theoretical framework                          |                                          |                                                                                                                                                                 |                                                                              |
| 9.                                             | Methodological orientation and theory    | What methodological orientation was stated to underpin the study? <i>E.g. grounded theory, discourse analysis, ethnography, phenomenology, content analysis</i> | Methods, Data analysis, page 5, Supplementary file 3                         |
| Participant selection                          |                                          |                                                                                                                                                                 |                                                                              |
| 10.                                            | Sampling                                 | How were participants selected? <i>E.g. purposive, convenience, consecutive, snowball</i>                                                                       | Methods, Data preparation, page 4                                            |
| 11.                                            | Method of approach                       | How were participants approached? <i>E.g. face-to-face, telephone, mail, email</i>                                                                              | Methods, Data preparation, page 4                                            |
| 12.                                            | Sample size                              | How many participants were in the study?                                                                                                                        | Results, page 6                                                              |
| 13.                                            | Non-participation                        | How many people refused to participate or dropped out? What were the reasons for this?                                                                          | Results, page 6                                                              |
| Setting                                        |                                          |                                                                                                                                                                 |                                                                              |
| 14.                                            | Setting of data collection               | Where was the data collected? <i>E.g. home, clinic, workplace</i>                                                                                               | Results, page 6                                                              |
| 15.                                            | Presence of non-participants             | Was anyone else present besides the participants and researchers?                                                                                               | No, but not specifically stated                                              |

|                                        |                                |                                                                                                                                          |                                                                              |
|----------------------------------------|--------------------------------|------------------------------------------------------------------------------------------------------------------------------------------|------------------------------------------------------------------------------|
| 16.                                    | Description of sample          | What are the important characteristics of the sample? <i>E.g. demographic data, date</i>                                                 | Results, page 6 and Table 1                                                  |
| <b>Data collection</b>                 |                                |                                                                                                                                          |                                                                              |
| 17.                                    | Interview guide                | Were questions, prompts, guides provided by the authors? Was it pilot tested?                                                            | Methods, page 4, Supplementary file 2                                        |
| 18.                                    | Repeat interviews              | Were repeat interviews carried out? If yes, how many?                                                                                    | Repeat interviews were not carried out, and have therefore not been reported |
| 19.                                    | Audio/visual recording         | Did the research use audio or visual recording to collect the data?                                                                      | Methods, Data preparation, page 4                                            |
| 20.                                    | Field notes                    | Were field notes made during and/or after the interview or focus group?                                                                  | Methods, Data preparation, page 4                                            |
| 21.                                    | Duration                       | What was the duration of the interviews or focus group?                                                                                  | Methods, Data analysis, page 4                                               |
| 22.                                    | Data saturation                | Was data saturation discussed?                                                                                                           | Methods, Data analysis, page 4                                               |
| 23.                                    | Transcripts returned           | Were transcripts returned to participants for comment and/or correction?                                                                 | Methods, Data analysis, page 4                                               |
| <b>Domain 3: analysis and findings</b> |                                |                                                                                                                                          |                                                                              |
| <b>Data analysis</b>                   |                                |                                                                                                                                          |                                                                              |
| 24.                                    | Number of data coders          | How many data coders coded the data?                                                                                                     | Methods, Data analysis, page 5                                               |
| 25.                                    | Description of the coding tree | Did authors provide a description of the coding tree?                                                                                    | Methods, Data analysis, page 5                                               |
| 26.                                    | Derivation of themes           | Were themes identified in advance or derived from the data?                                                                              | Methods, Data analysis, page 5                                               |
| 27.                                    | Software                       | What software, if applicable, was used to manage the data?                                                                               | Methods, Data analysis, page 5                                               |
| 28.                                    | Participant checking           | Did participants provide feedback on the findings?                                                                                       | No, but not specifically stated                                              |
| <b>Reporting</b>                       |                                |                                                                                                                                          |                                                                              |
| 29.                                    | Quotations presented           | Were participant quotations presented to illustrate the themes / findings? Was each quotation identified? <i>E.g. Participant number</i> | Results, Table 3                                                             |
| 30.                                    | Data and findings consistent   | Was there consistency between the data presented and the findings?                                                                       | Yes, demonstrated in the results/discussion, but not specifically stated     |
| 31.                                    | Clarity of major themes        | Were major themes clearly presented in the findings?                                                                                     | Results, page 7 et seq.                                                      |
| 32.                                    | Clarity of minor themes        | Is there a description of diverse cases or discussion of minor themes?                                                                   | Results, page 7 et seq.                                                      |
